# Supplementary material
Source: PubMed Central journal article supplement (PMC6438767)
Supplement: NIHMS999807-supplement-Supp_info.pdf [file NIHMS999807-supplement-Supp_info.pdf]

## **SUPPLEMENTARY METHODS**

### **INTRAPERITONEAL PYRUVATE TOLERANCE TEST**

Mice fasted overnight were injected intraperitoneally with 2 g/kg sodium pyruvate. Tail blood was collected at 0, 15, 30, 45, 60, 90 and 120 min and glucose levels were determined using a glucometer (Elite; Bayer, Pittsburgh, PA).

### **HYPERINSULINEMIC/EUGLYCEMIC CLAMP AND TISSUE UPTAKE OF 2-DEOXYGLUCOSE**

Catheterization of jugular vein and carotid artery was performed in Sirt1-LKO and littermate control mice 5 days before the insulin clamp to allow for post-operative recovery. Insulin clamps and glucose tracer analyses in conscious, cannulated mice were performed as described (1). Glucose uptake into specific tissues was also measured by the bolus administration of 2-deoxy-d-[1-<sup>14</sup>C] glucose (Perkin Elmer, Wellesley, MA) at the end of the clamp procedure. The mice were euthanized 25 min later and tissue samples were collected, weighed, and digested in NCSII solubilizer (Amersham, Piscataway, NJ). Radioactivity in tissue and plasma samples was determined by liquid scintillation spectrometry.

### **SERUM INSULIN LEVEL**

Serum insulin levels were measured using the Ultrasensitive Mouse Insulin ELISA Assay following the manufacturer's instructions (Crystal Chem, Elk Grove Village, IL).

### **HEPATIC FATTY ACID PROFILE AND LIVER TRIGLYCERIDE MEASUREMENTS**

Snap-frozen liver samples were weighed, total lipids were extracted and fatty acids in mouse liver were measured as described in (2). A 500  $\mu$ L aliquot of the combined organic fractions was

mixed with 1 mL of TRITON X-100 5% in chloroform and evaporated under a stream of nitrogen. Samples were reconstituted by adding 1 mL of water and triglycerides were measured using the EnzyChrom Triglyceride Assay kit (BioAssay Systems, Hayward, CA).

## **QUANTITATIVE REAL-TIME PCR**

We used a model StepOne™ Real-Time PCR System (Applied Biosystems by Thermo Fisher Scientific, Waltham, MA) and iTaq SYBR Green Supermix with ROX (Bio-Rad Laboratories, Hercules, CA). Predesigned mouse and human *β-actin*, *Sirt1* and *Rictor* primers were from Qiagen (Valencia, CA). Gene expression values were calculated based on the  $\Delta\Delta C_t$  method.

## **WESTERN BLOTTING AND IMMUNOPRECIPITATION**

Protein was extracted from frozen liver samples or from cultured mouse primary hepatocytes or HepG2 cells. Western blotting was performed as described (3), and immunoprecipitation was performed using the Dynabeads® Protein G magnetic beads (Invitrogen, Gaithersburg, MD). Phospho-mTOR<sub>S2448</sub>, Phospho-mTOR<sub>S2481</sub>, mTOR, Phospho-p70S6K<sub>T389</sub>, Phospho-S6<sub>S235/236</sub>, Phospho-4EBP1<sub>T37/46</sub>, Phospho-4EBP1<sub>S65</sub>, Sirt1, Rictor, phospho-Akt<sub>S473</sub>, phospho-FOXO1<sub>S256</sub> and phospho-AMPK<sub>T172</sub> antibodies were from Cell Signaling Technology (Danvers, MA). Sirt1 and Rictor antibodies for immunoprecipitation were from Santa Cruz Biotechnology (Dallas, TX).  $\beta$ -actin antibody was from Abcam (Cambridge, MA). 4-HNE antibody was from NOF Corporation (White Plains, NY).

## **SIRT1 ACTIVITY ASSAY**

Sirt 1 activity was measured by Sirt1 immunoprecipitation followed by HDAC colorimetric activity assay using COLOR DE LYS® HDAC colorimetric activity assay kit (Enzo Life Sciences, Farmingdale, NY).

## **FATTY ACID OXIDATION**

Fatty acid  $\beta$ -oxidation was measured as previously described (4) with modifications, using the same liver lobe from each animal. Tissue homogenates (2.5 mg of liver) were used to measure total (both mitochondrial and peroxisomal) fatty acid oxidation activities in buffer containing KCl (30 mM), Tris/HCl (75 mM), EGTA (0.7 mM),  $MgCl_2$  (5 mM), NAD (1 mM), ATP (5 mM), CoA (100  $\mu$ M), L-carnitine (0.4 mM), L-malate (0.5 mM) and cytochrome c (25  $\mu$ M), pH 7.4; or to measure peroxisomal activity only, in the same buffer but lacking L-carnitine, L-malate and cytochrome c, and including antimycin (73  $\mu$ M) and rotenone (10  $\mu$ M) to block the respiratory chain. Fatty acid  $\beta$ -oxidation was initiated by addition of 120  $\mu$ M [ $1-^{14}C$ ] oleic acid (0.9  $\mu$ Ci/assay, 59 mCi/mmol) as potassium salt, bound to BSA in a 5:1 molar ratio. The end products were filtered for radioactivity measurements. All chemicals were from Sigma-Aldrich (St. Louis, MO) whereas [ $1-^{14}C$ ] oleic acid was from Perkin Elmer (Wellesley, MA).

## **MITOCHONDRIA COMPLEX ACTIVITY MEASUREMENTS**

Mitochondrial Complex I enzyme activity was determined using a microplate colorimetric assay kit (ab109721, Abcam, Cambridge, MA) with purified liver mitochondria (ab110168) according to the manufacturer's protocol. Data were expressed as fold change relative to control.

## **INDIRECT CALORIMETRY**

$O_2$  consumption and  $CO_2$  production were monitored by indirect calorimetry (Oxymax, Columbus Instruments) in metabolic chambers as described in (1). The chambers were equipped with two-dimensional infrared beam sensors (Opto-M3; Columbus Instruments, USA) to measure locomotor activity. The animals were acclimated to the chambers for 2 days, and  $VO_2$  and  $VCO_2$  measurements taken every 18 minutes were collected and recorded on a computer over the next 24 hours. During the 12-hour dark/12-hour light phases, mice had free access to food and water. Net oxidation rates of fat and carbohydrates were calculated

according to the formulae by Simonson and DeFronzo (5): Fat oxidation =  $1.69 \times (VO_2 - VCO_2)$ ; Carbohydrate oxidation =  $4.57 \times VCO_2 - 3.23 \times VO_2$ . Values were normalized with respect to the body weight and adjusted to an effective metabolic body size ( $kg^{0.75}$ ).

## **TOTAL ANTIOXIDANT CAPACITY**

Total antioxidant capacity in the circulation were measure using serum samples by a colorimetric kit from Abcam (ab65329) according to manufacture protocol.

## **FATTY ACID OXIDATION ASSAY IN LIVE CELLS**

Fatty acid oxidation rate was measured by cellular energy flux analysis using a fluorescence FAO kit from Abcam (ab217602).

## **TISSUE HISTOLOGY AND STAINING**

Formalin-fixed liver samples were processed, and 4- $\mu m$ -thick paraffin sections were stained with hematoxylin and eosin, Gills Formula (H&E, Thermo Fisher Scientific, Waltham, MA) and analyzed using an Olympus BX41 microscope (USA).

1. Godlewski G, Jourdan T, Szanda G, Tam J, Cinar R, Harvey-White J, Liu J, et al. Mice lacking GPR3 receptors display late-onset obese phenotype due to impaired thermogenic function in brown adipose tissue. *Sci Rep* 2015;5:14953.
2. Liu J, Cinar R, Xiong K, Godlewski G, Jourdan T, Lin Y, Ntambi JM, et al. Monounsaturated fatty acids generated via stearoyl CoA desaturase-1 are endogenous inhibitors of fatty acid amide hydrolase. *Proc Natl Acad Sci U S A* 2013;110:18832-18837.
3. Liu J, Gao B, Mirshahi F, Sanyal AJ, Khanolkar AD, Makriyannis A, Kunos G. Functional CB1 cannabinoid receptors in human vascular endothelial cells. *Biochem J* 2000;346 Pt 3:835-840.
4. Demizieux L, Degrace P, Gresti J, Loreau O, Noel JP, Chardigny JM, Sebedio JL, et al. Conjugated linoleic acid isomers in mitochondria: evidence for an alteration of fatty acid oxidation. *J Lipid Res* 2002;43:2112-2122.
5. Simonson DC, DeFronzo RA. Indirect calorimetry: methodological and interpretative problems. *Am J Physiol* 1990;258:E399-412.
